# Supplementary material
Source: ML conference proceedings conference paper supplement (https://www.ecva.net/papers/eccv_2022/papers_ECCV/html/136740261_ECCV_2022_paper.php)
Supplement: Supplementary file 1 [file 136740261-supp.pdf]

# Learning Semantic Correspondence with Sparse Annotations

## - Supplementary Material -

Shuaiyi Huang<sup>1</sup>, Luyu Yang<sup>1</sup>, Bo He<sup>1</sup>, Songyang Zhang<sup>2</sup>,  
Xuming He<sup>3,4</sup>, and Abhinav Shrivastava<sup>1</sup>

<sup>1</sup> University of Maryland, College Park

<sup>2</sup> Shanghai AI Laboratory

<sup>3</sup> ShanghaiTech University

{huangshy, loyo, bohe}@umd.edu, zhangsongyang@pjlab.org.cn,  
hexm@shanghaitech.edu.cn, abhinav@cs.umd.edu

In this supplementary material, we provide more detailed quantitative analysis and qualitative results of our method as follows: i) Apart from the PCK results by category reported in the main paper, we additionally provide the PCK results by variation factors in Sec. A; ii) We further analyse model complexity by computing FLOPS in Sec. B; iii) Finally, we provide more qualitative results on PF-PASCAL [2], PF-WILLOW [3], and SPair-71k [1] in Sec. C.

### A. More Quantitative Results on SPair-71k

To have a better understanding of our method in different challenging scenarios, we report quantitative performance with respect to different levels of four variation factors (viewpoint, scale, truncation, and occlusion) on SPair-71k benchmark [1], as summarized in Table S1. Large PCK gains for all levels of image pairs indicate the robustness and effectiveness of our method.

**Table S1. PCK analysis by variation factors on SPair-71k [1] ( $\alpha_{bbox} = 0.1$ ).** The variation factors include view-point, scale, truncation, and occlusion with various difficulty levels. Numbers in bold indicate the best performance and underlined ones are the second best.

| Methods                    | View Point  |             |             | Scale       |             |             | Truncation  |             |             |             | Occlusion   |             |             |             | All         |
|----------------------------|-------------|-------------|-------------|-------------|-------------|-------------|-------------|-------------|-------------|-------------|-------------|-------------|-------------|-------------|-------------|
|                            | easy        | medi        | hard        | easy        | medi        | hard        | none        | src         | tgt         | both        | none        | src         | tgt         | both        |             |
| CNNGeoResNet-101 [4]       | 28.8        | 12.0        | 6.4         | 24.8        | 18.7        | 10.6        | 23.7        | 15.5        | 17.9        | 15.3        | 22.9        | 16.1        | 16.4        | 14.4        | 20.6        |
| A2NetResNet-101 [5]        | 30.9        | 13.3        | 7.4         | 26.1        | 21.1        | 12.4        | 25.0        | 17.4        | 20.5        | 17.6        | 24.6        | 18.6        | 17.2        | 16.4        | 22.3        |
| WeakAlignResNet-101 [6]    | 29.3        | 11.9        | 7.0         | 25.1        | 19.1        | 11.0        | 24.0        | 15.8        | 18.4        | 15.6        | 23.3        | 16.1        | 16.4        | 15.7        | 20.9        |
| NC-NetResNet-101 [7]       | 26.1        | 13.5        | 10.1        | 24.7        | 17.5        | 9.9         | 22.2        | 17.1        | 17.5        | 16.8        | 22.0        | 16.3        | 16.3        | 15.2        | 20.1        |
| HPFResNet-101 [8]          | 35.6        | 20.3        | 15.5        | 33.0        | 26.1        | 15.8        | 31.0        | 24.6        | 24.0        | 23.7        | 30.8        | 23.5        | 22.8        | 21.8        | 28.2        |
| SCOTResNet-101 [9]         | 42.7        | 28.0        | 23.9        | 41.1        | 33.7        | 21.4        | 39.0        | 32.4        | 30.0        | 30.0        | 39.0        | 30.3        | 28.1        | 26.0        | 35.6        |
| DHPFResNet-101 [10]        | 43.1        | 31.0        | 27.3        | 42.0        | 35.6        | 25.0        | 40.3        | 34.7        | 32.5        | 30.9        | 40.4        | 32.5        | 30.3        | 28.1        | 37.3        |
| CATsResNet-101 [11]        | 54.0        | 45.5        | 43.1        | 54.7        | 49.3        | 35.3        | 48.1        | 53.7        | 42.3        | 42.4        | 44.0        | 53.2        | 42.9        | 41.7        | 49.9        |
| PMNCResNet-101 [12]        | 53.3        | <u>47.4</u> | <u>45.9</u> | 53.7        | 49.6        | <u>41.5</u> | <b>54.3</b> | 46.8        | 45.0        | 41.9        | <b>54.2</b> | 43.9        | 43.0        | 38.4        | 50.4        |
| <b>Ours(ST)</b> ResNet-101 | <u>57.1</u> | 47.1        | 44.8        | <u>56.3</u> | <u>52.2</u> | 39.6        | 48.7        | <u>56.5</u> | <u>45.9</u> | <u>43.5</u> | 46.4        | <u>55.6</u> | <u>45.9</u> | <u>43.1</u> | <u>52.4</u> |
| <b>Ours(MT)</b> ResNet-101 | <b>59.6</b> | <b>50.7</b> | <b>48.3</b> | <b>59.0</b> | <b>55.3</b> | <b>43.4</b> | <u>52.5</u> | <b>59.3</b> | <b>48.8</b> | <b>46.0</b> | <u>50.3</u> | <b>58.3</b> | <b>49.0</b> | <b>46.1</b> | <b>55.3</b> |

## B. FLOPS Comparison

We compare the model complexity of our proposed network with existing work [11, 7] by computing FLOPS with facebookresearch/fvcore library. We summarize the results in Table S2. Our proposed network has 1.54M and 310.27M lower total FLOPS compared with CATs [11] and NCNet [7], respectively, as we do not use any conv4d or self-attention layers for correlation refinement.

**Table S2.** FLOPS Comparison between baselines and ours.

| Model     | Corr Refine    | Total<br>FLOPS (M) | Conv Op.<br>FLOPS (M) | Linear Op.<br>FLOPS (M) |
|-----------|----------------|--------------------|-----------------------|-------------------------|
| CATs [11] | Self-Attention | 3.52               | 1.83                  | 1.54                    |
| NCNet [7] | Conv4d         | 312.25             | 312.07                | 0.00                    |
| Ours      | None           | 1.98               | 1.83                  | 0.11                    |

## C. More Qualitative Results

More qualitative results from our method (MT) on SPair-71k [1], PF-PASCAL [2] and PF-WILLOW [3], are shown in Figure S1, S2 and S3, respectively.

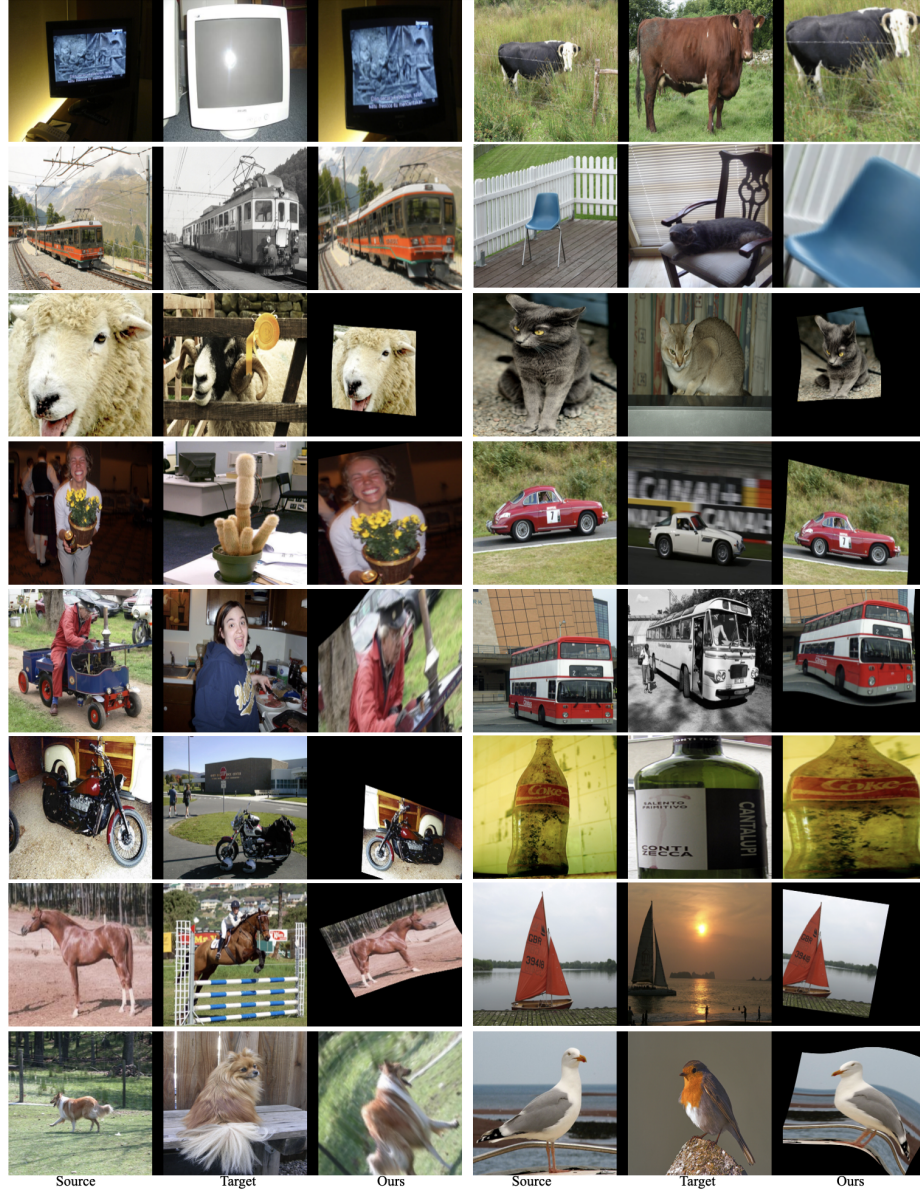

**Fig. S1. Qualitative results on SPair-71k benchmark [1].** From left to right are source image, target image and results from our method, respectively.

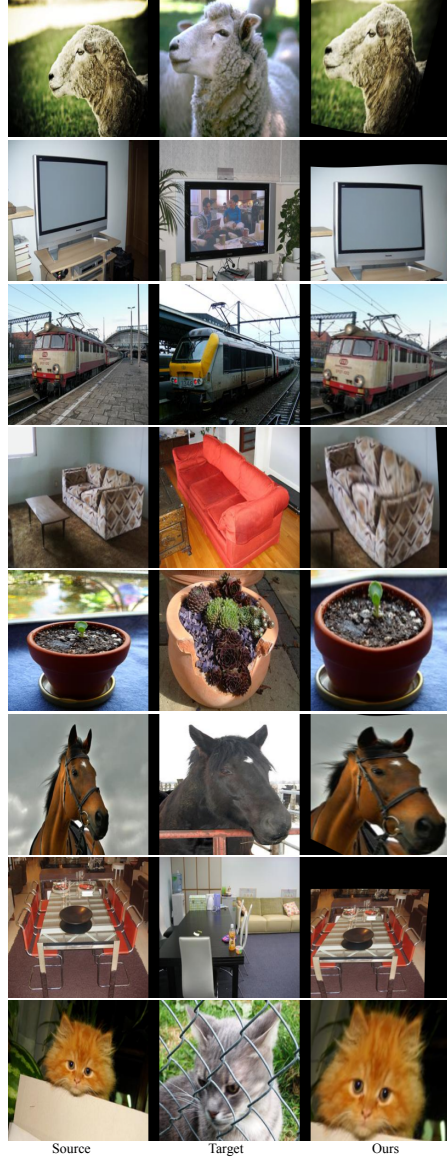

**Fig.S2. Qualitative results on PF-PASCAL benchmark [2].** From left to right are source image, target image and result from our method, respectively.

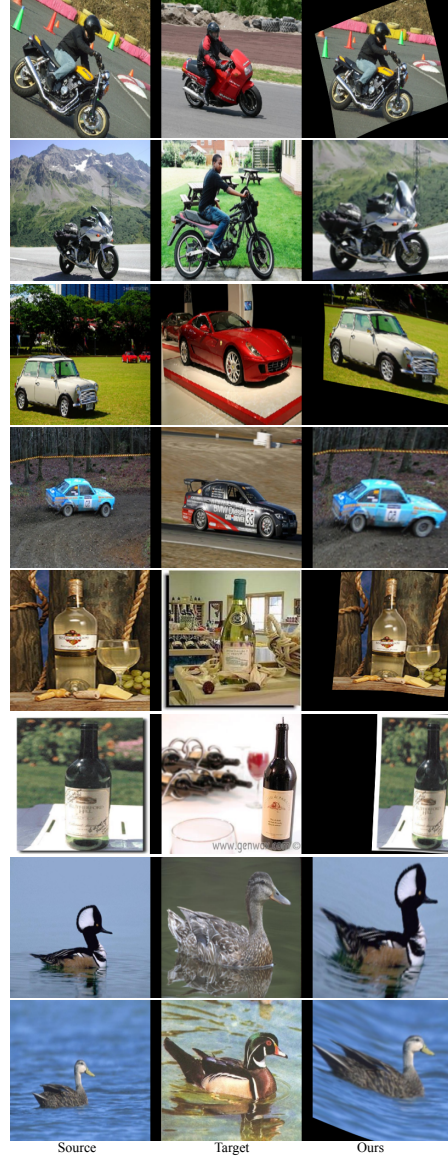

**Fig.S3. Qualitative results on PF-WILLOW benchmark [3].** From left to right are source image, target image and result from our method, respectively.



## References

1. Juhong Min, Jongmin Lee, Jean Ponce, and Minsu Cho. Spair-71k: A large-scale benchmark for semantic correspondence. *arXiv preprint arXiv:1908.10543*, 2019. [1](#), [2](#), [3](#)
2. Bumsu Ham, Minsu Cho, Cordelia Schmid, and Jean Ponce. Proposal flow: Semantic correspondences from object proposals. *IEEE Transactions on Pattern Analysis and Machine Intelligence*, 2018. [1](#), [2](#), [4](#)
3. Bumsu Ham, Minsu Cho, Cordelia Schmid, and Jean Ponce. Proposal flow. In *Proceedings of the IEEE Conference on Computer Vision and Pattern Recognition (CVPR)*, 2016. [1](#), [2](#), [4](#)
4. Ignacio Rocco, Relja Arandjelović, and Josef Sivic. Convolutional neural network architecture for geometric matching. In *Proceedings of the IEEE Conference on Computer Vision and Pattern Recognition (CVPR)*, 2017. [1](#)
5. Paul Hongsuck Seo, Jongmin Lee, Deunsol Jung, Bohyung Han, and Minsu Cho. Attentive semantic alignment with offset-aware correlation kernels. In *Proceedings of the European Conference on Computer Vision (ECCV)*, 2018. [1](#)
6. Ignacio Rocco, Relja Arandjelović, and Josef Sivic. End-to-end weakly-supervised semantic alignment. In *Proceedings of the IEEE Conference on Computer Vision and Pattern Recognition (CVPR)*, 2018. [1](#)
7. Ignacio Rocco, Mircea Cimpoi, Relja Arandjelović, Akihiko Torii, Tomas Pajdla, and Josef Sivic. Neighbourhood consensus networks. In *Advances in Neural Information Processing Systems (NeurIPS)*, 2018. [1](#), [2](#)
8. Juhong Min, Jongmin Lee, Jean Ponce, and Minsu Cho. Hyperpixel flow: Semantic correspondence with multi-layer neural features. In *Proceedings of the IEEE International Conference on Computer Vision (ICCV)*, 2019. [1](#)
9. Yanbin Liu, Linchao Zhu, Makoto Yamada, and Yi Yang. Semantic correspondence as an optimal transport problem. In *Proceedings of the IEEE Conference on Computer Vision and Pattern Recognition (CVPR)*, 2020. [1](#)
10. Juhong Min, Jongmin Lee, Jean Ponce, and Minsu Cho. Learning to compose hypercolumns for visual correspondence. In *Proceedings of the European Conference on Computer Vision (ECCV)*, 2020. [1](#)
11. Seokju Cho, Sunghwan Hong, Sangryul Jeon, Yunsung Lee, Kwanghoon Sohn, and Seungryong Kim. Cats: Cost aggregation transformers for visual correspondence. In *Advances in Neural Information Processing Systems (NeurIPS)*, 2021. [1](#), [2](#)
12. Jae Yong Lee, Joseph DeGol, Victor Fragoso, and Sudipta N Sinha. Patchmatch-based neighborhood consensus for semantic correspondence. In *Proceedings of the IEEE Conference on Computer Vision and Pattern Recognition (CVPR)*, 2021. [1](#)
